# Supplementary material
Source: PubMed Central journal article supplement (PMC4931945)
Supplement: NIHMS754302-supplement-01.pdf [file NIHMS754302-supplement-01.pdf]

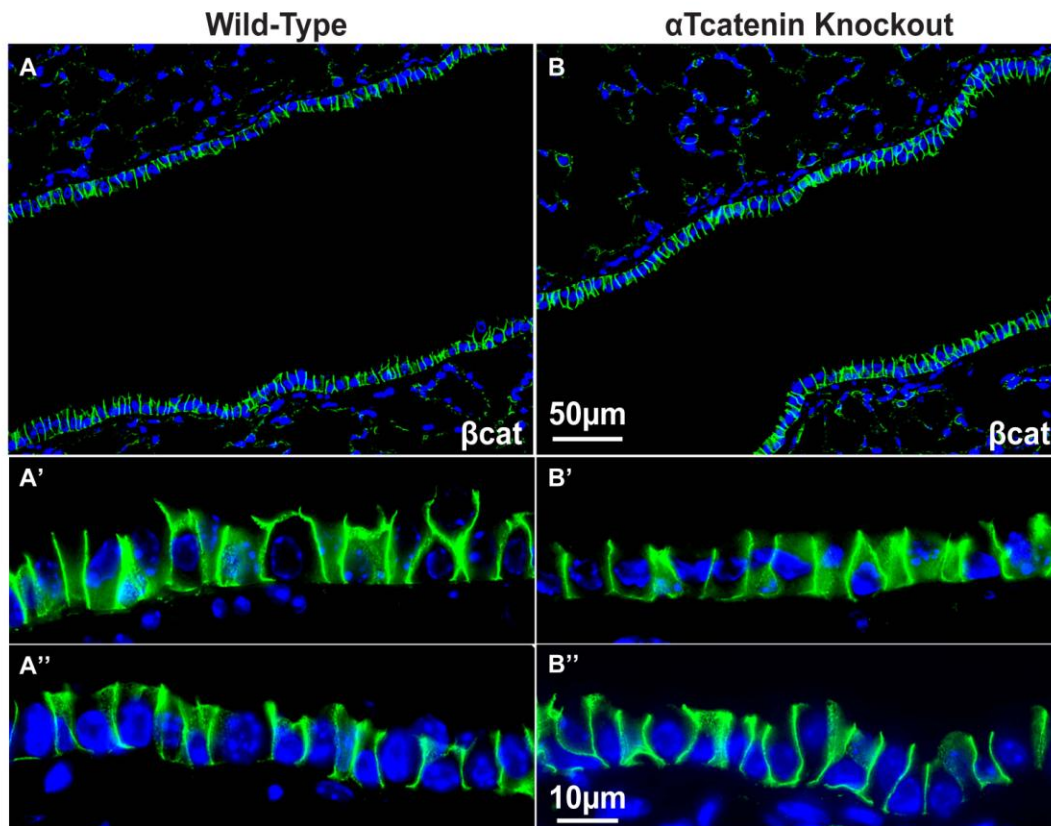

**Supplemental Figure 1:  $\beta$ -catenin protein expression and localization in the airway is not affected by loss of  $\alpha$ T-catenin.** Exposure-matched immunofluorescence images from wild-type (**A**) and  $\alpha$ T-cat knockout (**B**) airways stained for  $\beta$ -catenin (green) (BD Biosciences Clone 14; C19220). High-magnification (**A'**,**A''**,**B'**,**B''**) shows no obvious redistribution of  $\beta$ -catenin from airway epithelial cell-cell junctions.

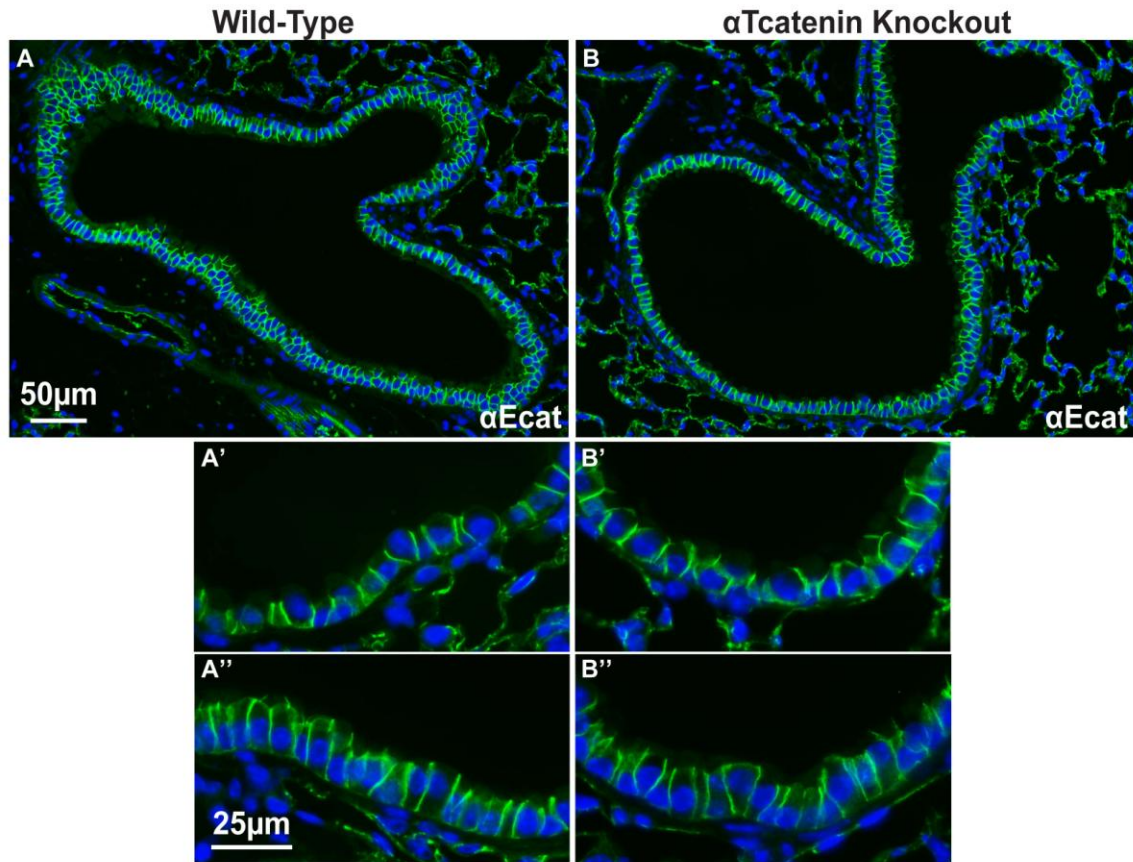

**Supplemental Figure 2:  $\alpha$ E-catenin protein expression and localization in the airway is not affected by loss of  $\alpha$ T-catenin.** Exposure-matched immunofluorescence images from wild-type (**A**) and  $\alpha$ T-catenin knockout (**B**) airways stained for  $\alpha$ E-catenin (green; BD Biosciences clone 5 monoclonal antibody; 610194). This antibody does not cross react with  $\alpha$ T-catenin (C.J.G., unpublished observations). High-magnification (**A'**, **A''**, **B'**, **B''**) shows no compensatory increase in  $\alpha$ E-catenin protein in  $\alpha$ T-catenin knockout airway epithelial cell-cell junctions relative to WT. Since there is no evidence for  $\alpha$ T-catenin expression in lung epithelia, compensatory upregulation of  $\alpha$ E-catenin as a result of loss of  $\alpha$ T-catenin appears restricted to cardiac cells, where both proteins are co-expressed (see Fig. 4C).

**Supplemental Figure 1:  $\beta$ -catenin protein expression and localization in the airway is not affected by loss of  $\alpha$ T-catenin.** Exposure-matched immunofluorescence images from wild-type (**A**) and  $\alpha$ T-cat knockout (**B**) airways stained for  $\beta$ -catenin (green) (BD Biosciences Clone 14; C19220). High-magnification (**A',A'',B',B''**) shows no obvious redistribution of  $\beta$ -catenin from airway epithelial cell-cell junctions.

**Supplemental Figure 2:  $\alpha$ E-catenin protein expression and localization in the airway is not affected by loss of  $\alpha$ T-catenin.** Exposure-matched immunofluorescence images from wild-type (**A**) and  $\alpha$ T-catenin knockout (**B**) airways stained for  $\alpha$ E-catenin (green; BD Biosciences clone 5 monoclonal antibody; 610194). This antibody does not cross react with  $\alpha$ T-catenin (C.J.G., unpublished observations). High-magnification (**A',A'',B',B''**) shows no compensatory increase in  $\alpha$ E-catenin protein in  $\alpha$ T-catenin knockout airway epithelial cell-cell junctions relative to WT. Since there is no evidence for  $\alpha$ T-catenin expression in lung epithelia, compensatory upregulation of  $\alpha$ E-catenin as a result of loss of  $\alpha$ T-catenin appears restricted to cardiac cells, where both proteins are co-expressed (see Fig. 4C).
